# Supplementary material for: Modelling climate change responses in tropical forests: similar productivity estimates across five models, but different mechanisms and responses
Source: Copernicus journal article supplement (doi:10.5194/gmd-8-1097-2015), 2015-04-21
Supplement: Supplementary file 1 [file gmd-8-1097-2015-supplement.zip]

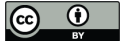

*Supplement of*

## **Modelling climate change responses in tropical forests: similar productivity estimates across five models, but different mechanisms and responses**

**L. Rowland et al.**

*Correspondence to:* L. Rowland ([lucy.rowland@ed.ac.uk](mailto:lucy.rowland@ed.ac.uk))

- [gmd-8-1097-2015-supplement-cover-letter.pdf](#)
- [Supplementary\\_figures](#)
  - [FS1.pdf](#)
