# Supplementary material for: Modelling climate change responses in tropical forests: similar productivity estimates across five models, but different mechanisms and responses
Source: Copernicus journal article supplement (doi:10.5194/gmd-8-1097-2015), 2015-04-21

CLM3.5 control

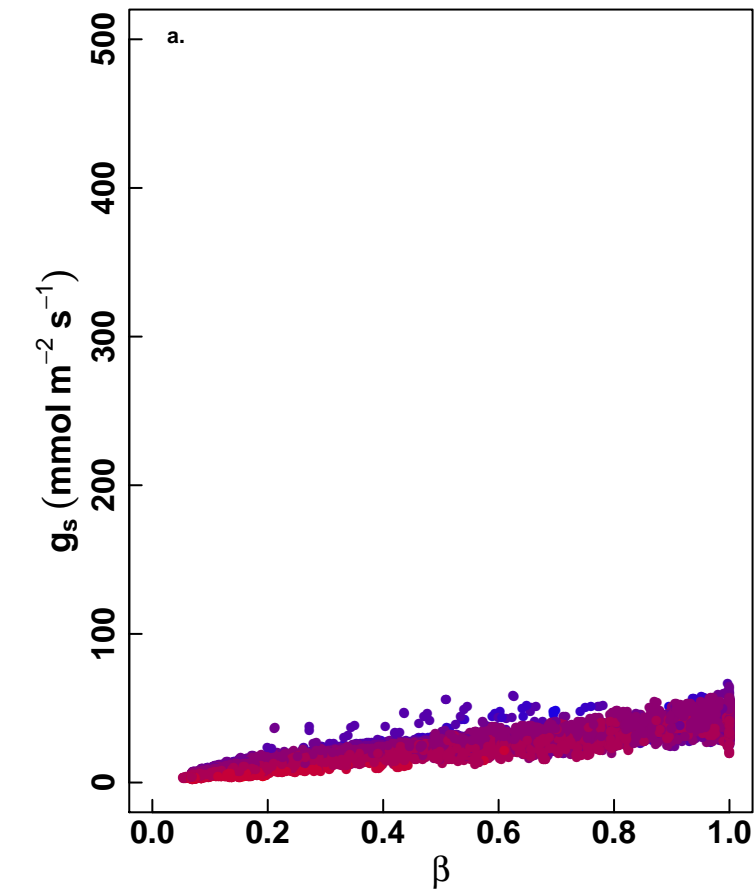

ED2 control

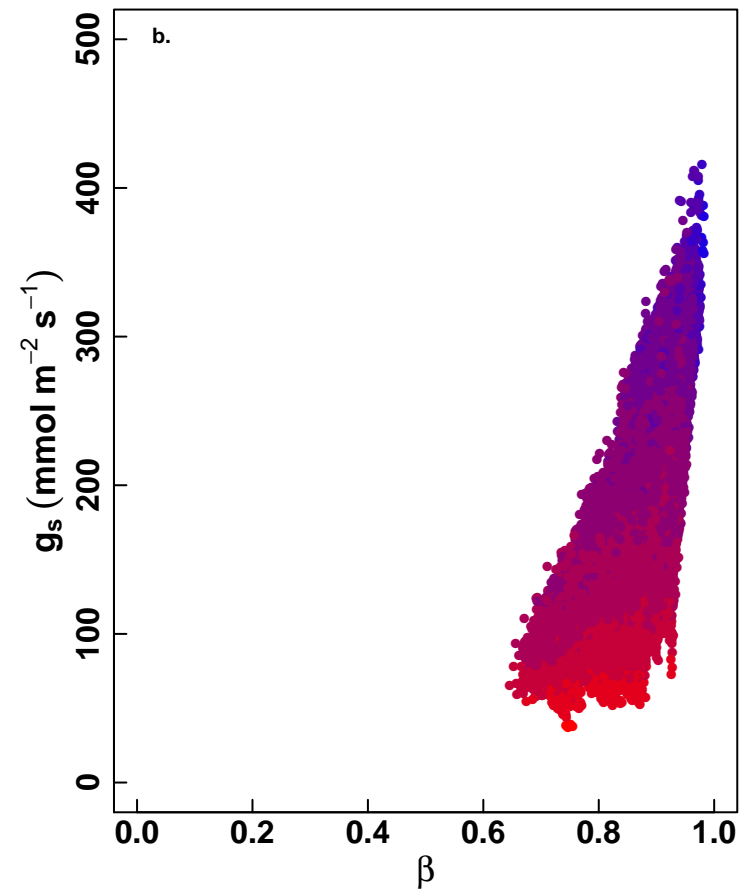

JULES control

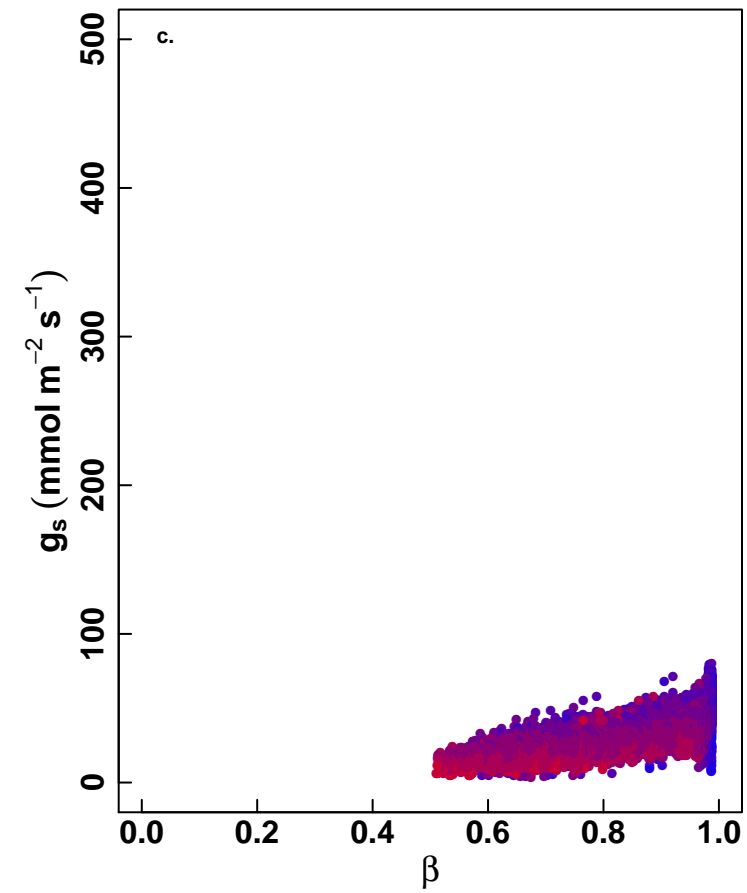

SiB3 control

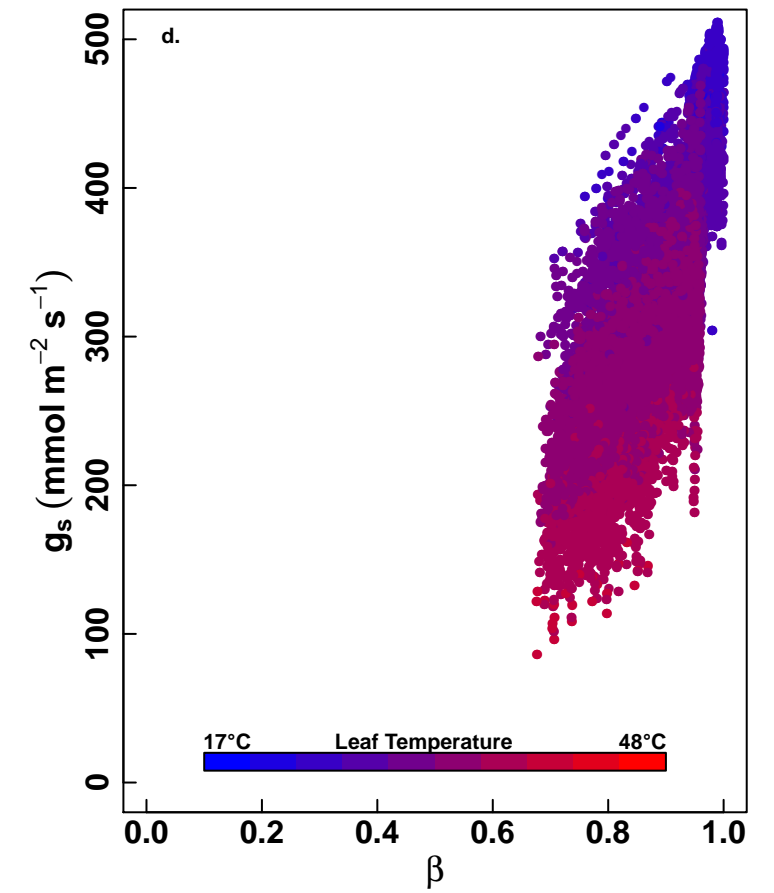

CLM3.5 drought

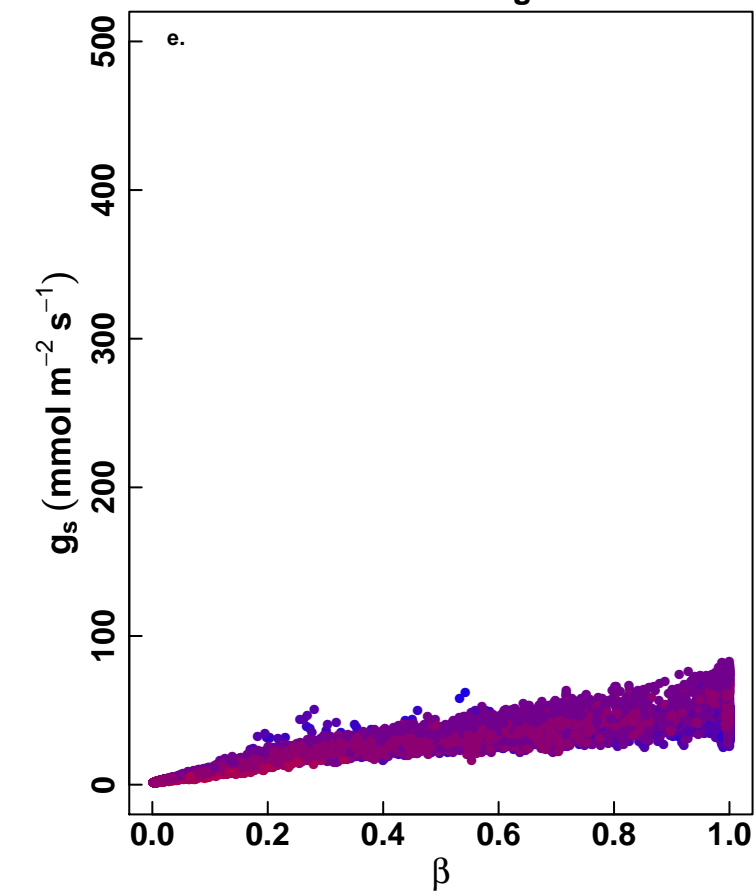

ED2 drought

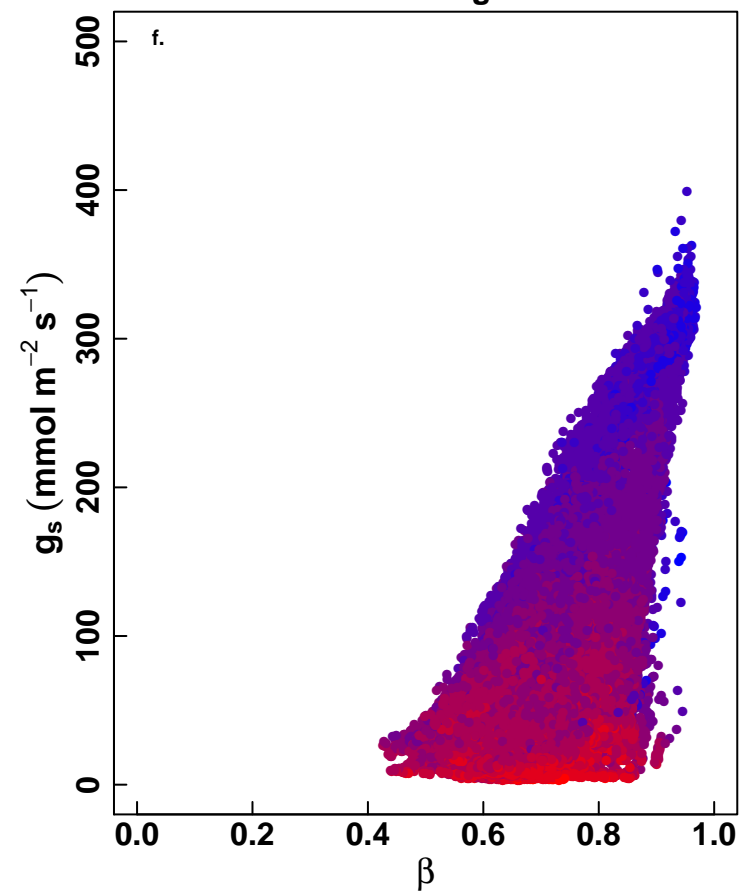

JULES drought

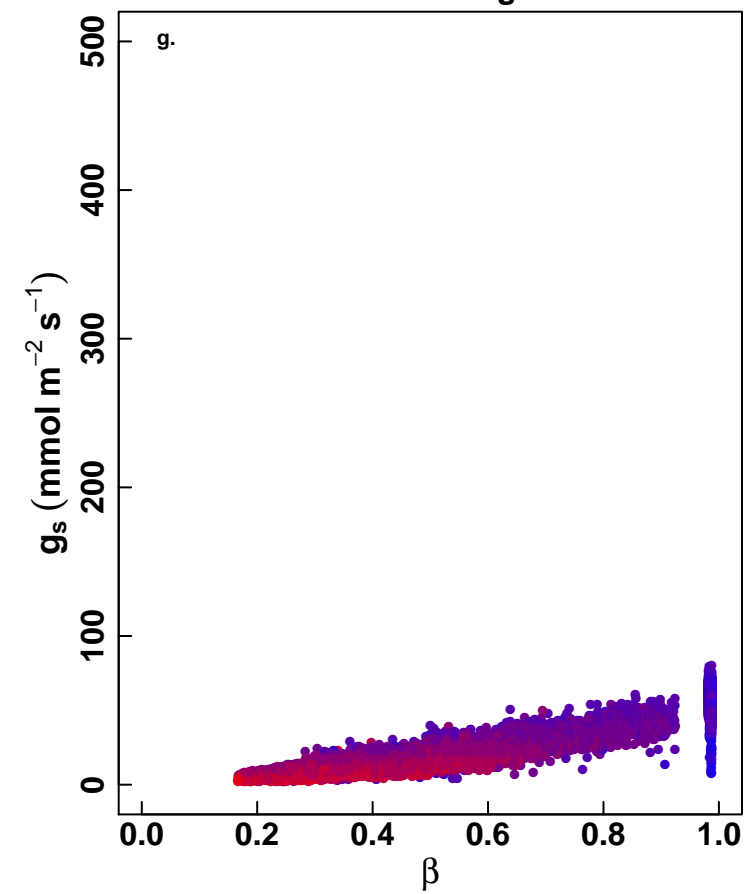

SiB3 drought

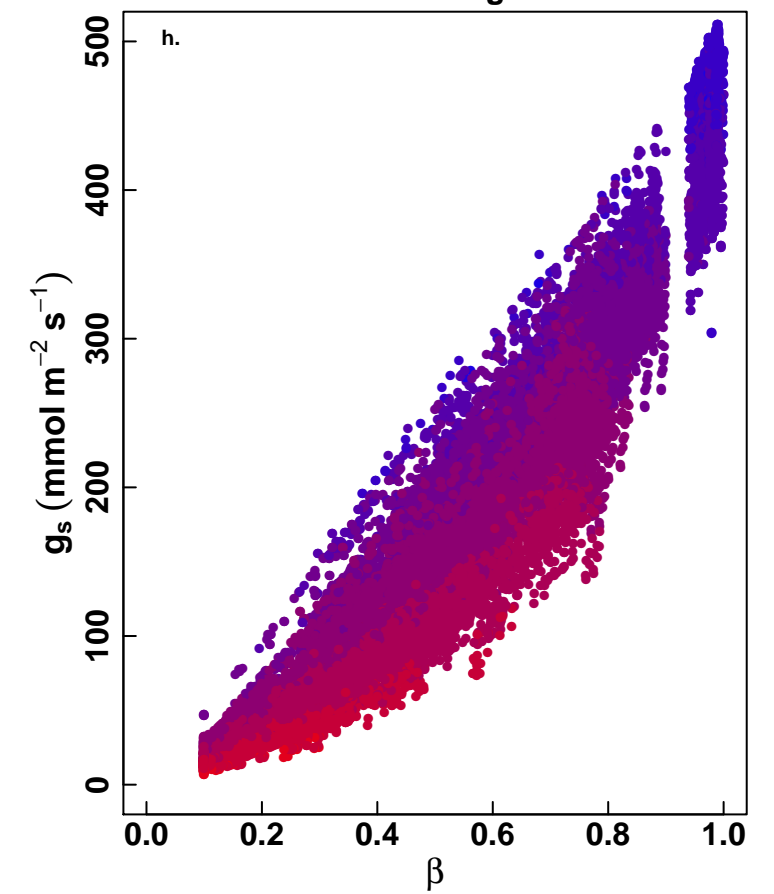

Supplement: Supplementary file 2 [file gmd-8-1097-2015-supplement.zip]
